# Supplementary material for: Pressure-induced Jahn–Teller switch in the homoleptic hybrid perovskite [(CH 3 ) 2 NH 2 ]Cu(HCOO) 3 : orbital reordering by unconventional degrees of freedom
Source: Royal Society of Chemistry journal article supplement (doi:10.1039/d1tc01966j), 2021-01-01
Supplement: d1tc01966j1.pdf [file d1tc01966j1.pdf]

## Pressure-induced Jahn-Teller Switch in the Homoleptic Hybrid Perovskite [(CH<sub>3</sub>)<sub>2</sub>NH<sub>2</sub>]Cu(HCOO)<sub>3</sub>: Orbital Reordering by Unconventional Degrees of Freedom

Rebecca Scatena,<sup>\*a</sup> Michał Andrzejewski,<sup>b</sup> Roger D. Johnson<sup>c</sup> and Piero Macchi<sup>d</sup>

<sup>a</sup> Department of Physics, Clarendon Laboratory, University of Oxford, Parks Rd., Oxford OX1 3PU, United Kingdom

<sup>b</sup> Department of Chemistry and Biochemistry, University of Bern, Freiestrasse 3, Bern CH-3012, Switzerland

<sup>c</sup> Department of Physics and astronomy, University College London, Gower Street, London WC1 6BT, United Kingdom

<sup>d</sup> Department of Chemistry, Materials, and Chemical Engineering, Polytechnic of Milan, Via Mancinelli 7, Milan 20131, Italy

### Supplementary Information

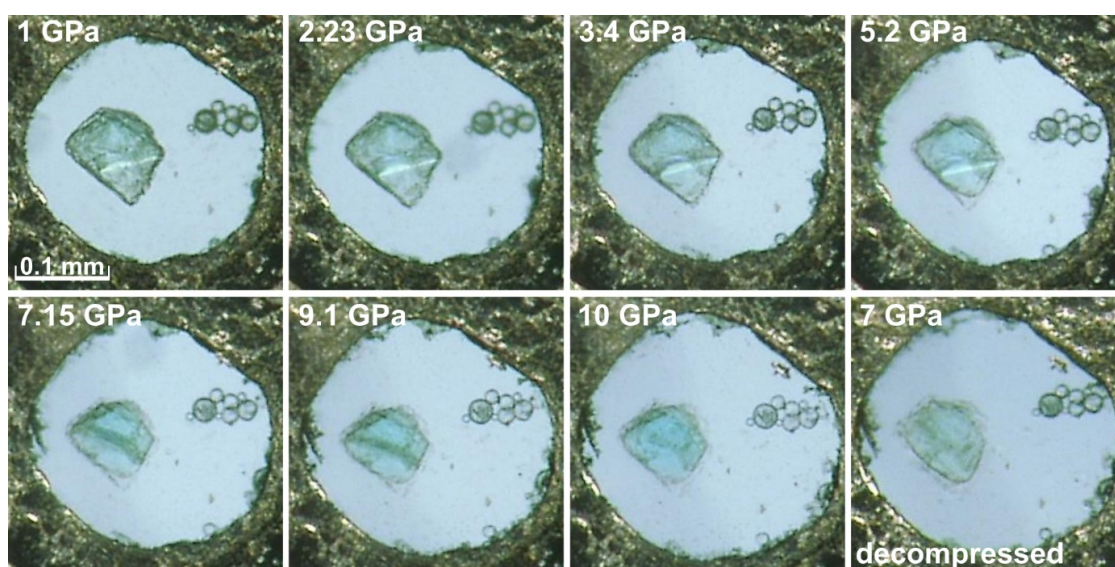

**Figure S1.** Single crystal of [Cu(HCOO)<sub>3</sub>]H<sub>2</sub>N(CH<sub>3</sub>)<sub>2</sub> in DAC. Ruby spheres are the spheres located by the edge.

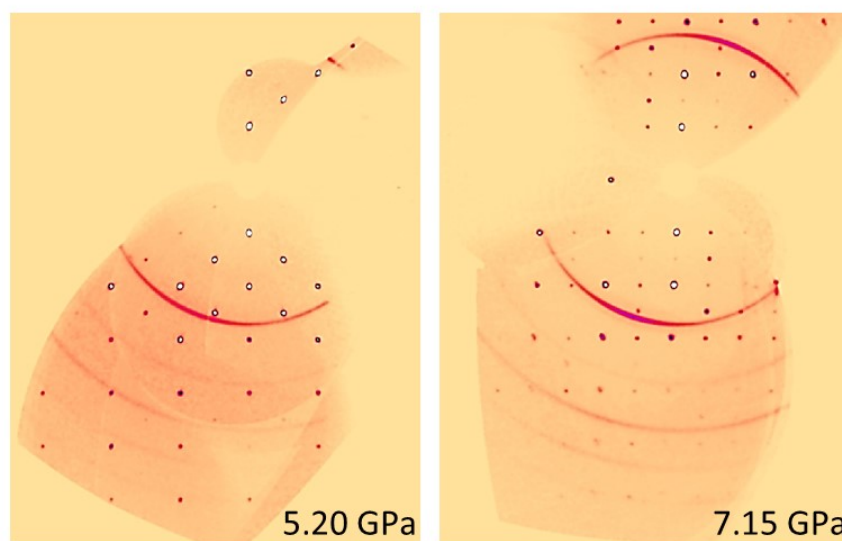

**Figure S2.** (0kl) diffraction plane for a single crystal of [(CH<sub>3</sub>)<sub>2</sub>NH<sub>2</sub>]Cu(HCOO)<sub>3</sub> at 5.20 and 7.15 GPa.

**Table S1.** Selected single crystal diffraction data and refinements details for  $[(\text{CH}_3)_2\text{NH}_2]\text{Cu}(\text{HCOO})_3$  at 295 K.

| Pressure (GPa)                            | 0.00001 GPa            | 1.0               | 2.23              | 3.40              | 3.8                 |
|-------------------------------------------|------------------------|-------------------|-------------------|-------------------|---------------------|
| Loading                                   | -                      | A                 | A                 | A                 | B                   |
| Crystal size                              | 0.6x0.3x0.3            | 0.1x0.08x0.05     | 0.1x0.08x0.05     | 0.1x0.08x0.05     | 0.11x0.072x0.0056   |
| phase                                     | $\alpha$               | $\alpha$          | $\alpha$          | $\alpha$          | $\alpha$            |
| Crystal system                            | monoclinic             | monoclinic        | monoclinic        | monoclinic        | monoclinic          |
| Space group                               | $I2/a$                 | $I2/a$            | $I2/a$            | $I2/a$            | $I2/a$              |
| $\lambda$ (Å)                             | 0.71073                | 0.71073           | 0.71073           | 0.71073           | 0.49647             |
| a (Å)                                     | 8.8330(4)              | 8.6895(13)        | 8.5019(14)        | 8.323(3)          | 8.2878(9)           |
| b (Å)                                     | 8.7093(4)              | 8.5925(10)        | 8.5043(10)        | 8.4733(14)        | 8.4645(6)           |
| c (Å)                                     | 11.4145(5)             | 11.3323(4)        | 11.2256(4)        | 11.1183(7)        | 11.0942(3)          |
| $\alpha$ (°)                              | 90                     | 90                | 90                | 90                | 90                  |
| $\beta$ (°)                               | 96.224(4)              | 95.623(7)         | 95.055(7)         | 94.553(12)        | 94.521(4)           |
| $\gamma$ (°)                              | 90                     | 90                | 90                | 90                | 90                  |
| Volume (Å <sup>3</sup> )                  | 872.93(7)              | 842.05(16)        | 808.48(17)        | 781.7(3)          | 775.86(10)          |
| Z / Z'                                    | 4/1                    | 4/1               | 4/1               | 4/1               | 4/1                 |
| Min/max hkl                               | -11/12, -11/12, -15/15 | -6/5, -8/5, -14/8 | -5/5, -8/5, -8/13 | -4/5, -8/6, -8/13 | -7/9, -9/10, -17/17 |
| 2 $\theta$ ranges (°)                     | 7.182 – 59.158         | 6.684 – 52.856    | 6.79 – 51.294     | 6.052 – 51.864    | 5.152 – 52.944      |
| Collected/unique                          | 8550 / 1133            | 838 / 254         | 771 / 237         | 710 / 229         | 1139 / 688          |
| $r_{\text{int}}$ / %                      | 4.32                   | 3.21              | 2.87              | 4.05              | 1.57                |
| Completeness (%)                          | 99.6                   | 29.26             | 30.50             | 29.78             | 29.28               |
| GOF $w$                                   | 1.140                  | 1.115             | 1.103             | 1.108             | 1.091               |
| R <sub>1</sub> (F) % [ $I \geq 2\sigma$ ] | 2.36                   | 3.39              | 3.35              | 4.38              | 3.59                |
| R <sub>1</sub> (F) % [all]                | 2.89                   | 4.29              | 4.36              | 5.24              | 4.15                |
| $w_1/w_2$                                 | 0.03 / 0.40            | 0.06 / 1.40       | 0.033 / 5.91      | 0.06 / 1.54       | 0.082 / 0           |
| peak/hole (eÅ <sup>-3</sup> )             | 0.32 / -0.58           | 0.25 / -0.28      | 0.23 / -0.26      | 0.34 / -0.33      | 0.39 / -0.41        |

**Table S2.** Selected single crystal diffraction data and refinements details for  $[(\text{CH}_3)_2\text{NH}_2]\text{Cu}(\text{HCOO})_3$  at 295 K.

| Pressure (GPa)                            | 5.20              | 7.15                | 8.30                  | 9.10             |
|-------------------------------------------|-------------------|---------------------|-----------------------|------------------|
| Loading                                   | A                 | A                   | B                     | A                |
| Crystal size                              | 0.1x0.08x0.05     | 0.1x0.08x0.05       | 0.11x0.072x0.056      | 0.1x0.08x0.05    |
| phase                                     | $\alpha$          | $\gamma$            | $\gamma$              | $\gamma$         |
| Crystal system                            | monoclinic        | triclinic           | triclinic             | triclinic        |
| Space group                               | $I2/a$            | $P\bar{1}$          | $P\bar{1}$            | $P\bar{1}$       |
| $\lambda$ (Å)                             | 0.71073           | 0.71073             | 0.49647               | 0.71073          |
| a (Å)                                     | 8.086(4)          | 7.2638(16)          | 7.2432(13)            | 7.2332(8)        |
| b (Å)                                     | 8.466(2)          | 8.5726(15)          | 8.5444(11)            | 8.5452(10)       |
| c (Å)                                     | 10.9541(9)        | 11.2929(17)         | 11.2169(19)           | 11.085(4)        |
| $\alpha$ (°)                              | 90                | 92.384(13)          | 92.441(13)            | 92.908(17)       |
| $\beta$ (°)                               | 94.215(17)        | 101.797(16)         | 102.055(15)           | 102.278(18)      |
| $\gamma$ (°)                              | 90                | 91.352(16)          | 91.298(13)            | 91.268(10)       |
| Volume (Å <sup>3</sup> )                  | 747.8(4)          | 687.4(2)            | 677.92(19)            | 668.2(3)         |
| Z / Z'                                    | 4/1               | 4/2                 | 4/2                   | 4/2              |
| Min/max hkl                               | -4/4, -7/5, -13/7 | -6/6, -10/7, -15/15 | -12/12, -14/15, -12/9 | -8/4, -7/6, -4/7 |
| 2 $\theta$ ranges (°)                     | 6.088 – 50.962    | 3.688 – 56.738      | 3.334 – 55.312        | 4.776 – 51.684   |
| Collected/unique                          | 350 / 120         | 3829 / 737          | 3954 / 2430           | 1301 / 432       |
| $r_{\text{int}}$ / %                      | 2.45              | 5.96                | 6.41                  | 4.38             |
| Completeness (%)                          | 17.19             | 21.38               | 47.1                  | 17.69            |
| GOF $w$                                   | 1.115             | 1.063               | 1.078                 | 1.118            |
| R <sub>1</sub> (F) % [ $I \geq 2\sigma$ ] | 3.36              | 7.67                | 5.08                  | 5.47             |
| R <sub>1</sub> (F) % [all]                | 3.95              | 13.06               | 10.64                 | 8.66             |
| $w_1/w_2$                                 | 0.061 / 10.3      | 0.142 / 10.3        | 0.055 / 0             | 0.095 / 1.32     |
| peak/hole (eÅ <sup>-3</sup> )             | 0.19 / -0.22      | 0.67 / -0.66        | 0.7 / -0.5            | 0.34 / -0.31     |

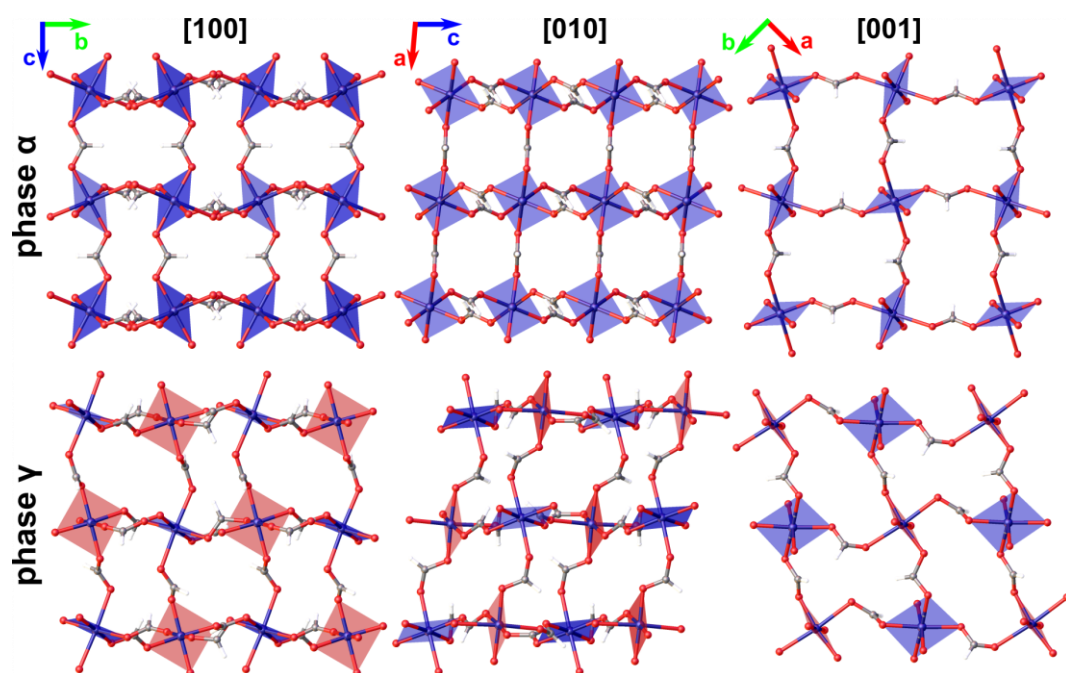

**Figure S3.** Fragments of  $[(\text{CH}_3)_2\text{NH}_2]\text{Cu}(\text{HCOO})_3$  structure in the  $\alpha$  and  $\gamma$  phase viewed along the main crystallographic directions. Equatorial planes perpendicular to JT axes are highlighted by the blue and red square planes.

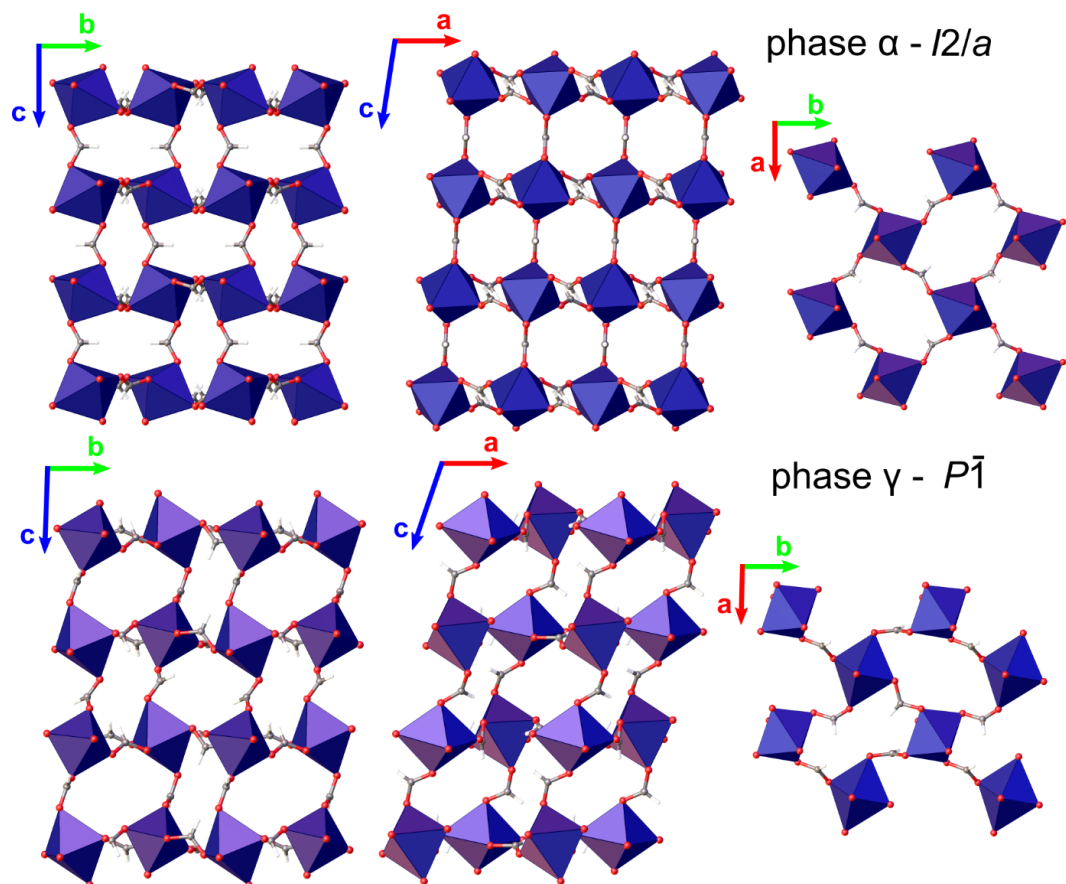

**Figure S4.** View along the  $a$ ,  $b$ , and  $c$  crystallographic axis of the  $\text{CuO}_6$  octahedra bridged by formate  $[\text{HCOO}^-]$  ligands in the  $\alpha$  and  $\gamma$  phases. The dimethylammonium  $[\text{H}_2\text{N}(\text{CH}_3)_2]^+$  A site cations were omitted for sake of clarity.

**Table S3.** Structure of the *P4*/mmm parent cell.

| Atom | x        | y        | z        | g      |
|------|----------|----------|----------|--------|
| Cu1  | 0.000000 | 0.000000 | 0.000000 | 0.0625 |
| O1   | 0.000000 | 0.000000 | 0.305817 | 0.1250 |
| O2   | 0.321708 | 0.000000 | 0.000000 | 0.2500 |
| C1   | 0.500000 | 0.000000 | 0.000000 | 0.1250 |
| C2   | 0.000000 | 0.000000 | 0.500000 | 0.0625 |
| C3   | 0.500000 | 0.500000 | 0.597350 | 0.1250 |
| N1   | 0.500000 | 0.500000 | 0.500000 | 0.0625 |

**Table S4.** Mode amplitudes refined as function of pressure for the monoclinic *I2/a*  $\alpha$ -phase from single crystal x-ray data.

| Mode                                    | Normalization factor/direction | 0.0004 GPa  | 1.0 GPa    | 2.23 GPa   | 3.40 GPa   | 4.75 GPa    | 5.20 GPa    |
|-----------------------------------------|--------------------------------|-------------|------------|------------|------------|-------------|-------------|
| $\Gamma$ 1+ O <sub>c</sub>              | 0.0435/(0,0,1)                 | -0.0046(58) | 0.002(21)  | -0.038(16) | -0.032(19) | -0.053(77)  | -0.0578(26) |
| $\Gamma$ 1+ O <sub>ab</sub>             | 0.0283/(1,1,0)                 | -0.0324(62) | -0.032(32) | -0.040(24) | -0.022(34) | -0.119(26)  | -0.044(44)  |
| $\Gamma$ 1+ C <sub>DMA</sub>            | 0.0435/(0,0,1)                 | 0.207(11)   | 0.197(33)  | 0.305(24)  | 0.350(32)  | 0.324(16)   | 0.495(38)   |
| $\Gamma$ 4+ O <sub>ab</sub>             | 0.0283/(1,-1,0)                | -0.0146(66) | -0.006(35) | -0.105(25) | -0.190(36) | -0.123(13)  | -0.159(58)  |
| $\Gamma$ 5+ O <sub>c</sub>              | 0.0566/(1,0,0)                 | -0.1320(61) | -0.134(36) | -0.116(25) | -0.148(37) | -0.164(12)  | -0.080(52)  |
| $\Gamma$ 5+ O <sub>ab</sub>             | 0.0308/(0,0,1)                 | -0.2026(64) | -0.267(25) | -0.249(17) | -0.303(21) | -0.2486(86) | -0.338(30)  |
| $\Gamma$ 5+ C <sub>DMA</sub>            | 0.0566/(1,0,0)                 | -1.9553(99) | -2.171(55) | -1.946(43) | -2.034(67) | -1.988(22)  | -1.888(75)  |
| A2+ O <sub>ab</sub>                     | 0.0283/(1,1,0)                 | -0.5967(62) | -0.477(36) | -0.471(27) | -0.356(33) | -0.302(11)  | -0.265(50)  |
| A2+ C <sub>ab</sub>                     | 0.0400/(1,1,0)                 | 0.4230(95)  | 0.356(59)  | 0.331(42)  | 0.199(56)  | 0.258(16)   | 0.125(90)   |
| A3+ O <sub>ab</sub>                     | 0.0283/(1,-1,0)                | -1.9606(65) | -1.982(32) | -1.993(24) | -2.045(34) | -2.050(12)  | -2.071(44)  |
| A3+ C <sub>ab</sub>                     | 0.0400/(1,-1,0)                | 0.5274(94)  | 0.430(49)  | 0.555(36)  | 0.529(53)  | 0.483(16)   | 0.489(71)   |
| A5+ O <sub>c</sub>                      | 0.0566/(0,1,0)                 | -1.8557(62) | -1.886(29) | -2.029(21) | -2.091(26) | -2.089(10)  | -2.211(35)  |
| A5+ O <sub>ab</sub>                     | 0.0308/(0,0,1)                 | 2.1612(63)  | 2.238(22)  | 2.228(16)  | 2.338(18)  | 2.3157(90)  | 2.476(25)   |
| A5+ C <sub>ab</sub>                     | 0.0435/(0,0,1)                 | -0.6488(91) | -0.603(32) | -0.690(25) | -0.718(28) | -0.754(12)  | -0.740(40)  |
| A5+ C <sub>c</sub>                      | 0.0800/(0,1,0)                 | -0.4463(91) | -0.511(44) | -0.512(32) | -0.601(35) | -0.575(13)  | -0.553(56)  |
| A5+ N <sub>DMA</sub>                    | 0.0800/(0,1,0)                 | 0.8357(80)  | 0.855(38)  | 0.770(26)  | 0.728(31)  | 0.703(13)   | 0.681(48)   |
| A5+ C <sub>DMA</sub>                    | 0.0566/(0,1,0)                 | 0.531(10)   | 0.517(57)  | 0.579(37)  | 0.591(47)  | 0.635(18)   | 0.652(67)   |
| R <sub>F</sub> [I $\geq$ 3 $\sigma$ ] % | -                              | 3.64        | 6.53       | 5.31       | 4.90       | 4.99        | 6.01        |

**Table S5.** Mode amplitudes refined as function of pressure for the triclinic *P-1*  $\gamma$ -phase from single crystal x-ray data.

| Mode                         | Normalization factor/direction | 7.15 GPa   | 9.10 GPa     |
|------------------------------|--------------------------------|------------|--------------|
| $\Gamma$ 1+ O <sub>c</sub>   | 0.03080/(0,0,1)                | 0.784(28)  | 1.081(76)    |
| $\Gamma$ 1+ O <sub>ab</sub>  | 0.02000/(1,1,0)                | 0.611(84)  | 0.364(29)    |
| $\Gamma$ 1+ C <sub>DMA</sub> | 0.03080/(0,0,1)                | -0.312(53) | 0.01(11)     |
| $\Gamma$ 2+ O <sub>ab</sub>  | 0.02000/(1,1,0)                | -1.044(85) | -0.645(30)   |
| $\Gamma$ 3+ O <sub>ab</sub>  | 0.02000/(1,-1,0)               | 1.293(75)  | 1.325(33)    |
| $\Gamma$ 4+ O <sub>ab</sub>  | 0.02000/(1,1,0)                | -1.490(73) | -1.281(32)   |
| $\Gamma$ 5+ O <sub>c</sub>   | 0.02830/(1,-1,0)               | 0.823(98)  | 0.920(31)    |
| $\Gamma$ 5+ O <sub>c</sub>   | 0.02830/(1,-1,0)               | 1.826(40)  | 2.054(33)    |
| $\Gamma$ 5+ O <sub>ab</sub>  | 0.03080/(0,0,1)                | 0.914(32)  | 0.842(82)    |
| $\Gamma$ 5+ O <sub>ab</sub>  | 0.03080/(0,0,1)                | -0.084(29) | -0.165(59)   |
| $\Gamma$ 5+ C <sub>DMA</sub> | 0.02830/(1,-1,0)               | 1.23(17)   | 1.704(54)    |
| $\Gamma$ 5+ C <sub>DMA</sub> | 0.02830/(1,1,0)                | -2.963(76) | -2.662(56)   |
| M2- N <sub>DMA</sub>         | 0.04350/(0,0,1)                | -0.836(42) | -1.084(89)   |
| M2- C <sub>DMA</sub>         | 0.03080/(0,0,1)                | 0.303(51)  | 0.39(11)     |
| M3- Cu                       | 0.04350/(0,0,1)                | -0.331(05) | -0.46671(80) |
| M3- O <sub>c</sub>           | 0.03080/(0,0,1)                | -0.462(36) | -0.33043(56) |
| M3- O <sub>ab</sub>          | 0.02180/(0,0,1)                | -0.594(33) | -0.98331(40) |
| M3- C <sub>c</sub>           | 0.04350/(0,0,1)                | -0.115(51) | -0.46671(80) |
| M4- O <sub>ab</sub>          | 0.02180/(0,0,1)                | -0.070(36) | 0.16(10)     |
| M5- Cu                       | 0.05660/(1,0,0)                | -0.062(20) | -0.164(10)   |
| M5- Cu                       | 0.05660/(0,1,0)                | -0.036(11) | -0.0755(80)  |
| M5- O <sub>c</sub>           | 0.124268/(1,0,0)               | 0.01(12)   | -0.286(33)   |
| M5- O <sub>c</sub>           | 0.04000/(0,1,0)                | -0.017(67) | -0.307(36)   |
| M5- O <sub>ab</sub>          | 0.02000/(1,-1,0)               | -0.192(96) | -0.217(37)   |
| M5- O <sub>ab</sub>          | 0.02000/(1,1,0)                | 0.134(99)  | -0.042(44)   |
| M5- O <sub>ab</sub>          | 0.02000/(1,1,0)                | 0.389(96)  | 0.571(37)    |

|                           |                  |                  |            |            |
|---------------------------|------------------|------------------|------------|------------|
| M5-                       | O <sub>ab</sub>  | 0.02000/(1,-1,0) | 0.345(96)  | 0.034(48)  |
| M5-                       | C <sub>c</sub>   | 0.05660/(1,0,0)  | 0.17(16)   | -0.163(51) |
| M5-                       | C <sub>c</sub>   | 0.05660/(0,1,0)  | -0.491(96) | -0.635(53) |
| M5-                       | N <sub>DMA</sub> | 0.05660/(1,0,0)  | -0.92(14)  | -0.962(43) |
| M5-                       | N <sub>DMA</sub> | 0.05660/(0,1,0)  | 0.352(83)  | 0.291(42)  |
| M5-                       | C <sub>DMA</sub> | 0.04000/(1,0,0)  | 1.34(15)   | 1.254(57)  |
| M5-                       | C <sub>DMA</sub> | 0.04000/(0,1,0)  | 0.751(85)  | 0.942(44)  |
| A1+                       | O <sub>c</sub>   | 0.03080/(0,0,1)  | -0.280(30) | -0.224(74) |
| A1+                       | O <sub>ab</sub>  | 0.02000/(1,1,0)  | 0.295(82)  | 0.249(34)  |
| A1+                       | C <sub>ab</sub>  | 0.02830/(1,1,0)  | -0.23(15)  | 0.548(63)  |
| A1+                       | C <sub>c</sub>   | 0.04350/(0,0,1)  | -0.852(49) | -0.81(13)  |
| A2+                       | O <sub>ab</sub>  | 0.02000/(1,-1,0) | -0.294(77) | -0.195(35) |
| A2+                       | C <sub>ab</sub>  | 0.02830/(1,-1,0) | -0.32(15)  | 0.647(62)  |
| A3+                       | O <sub>ab</sub>  | 0.02000/(1,1,0)  | 3.013(82)  | 3.179(33)  |
| A3+                       | C <sub>ab</sub>  | 0.02830/(1,1,0)  | -1.45(13)  | -2.056(59) |
| A4+                       | O <sub>ab</sub>  | 0.02000/(1,1,0)  | -0.144(82) | -0.342(34) |
| A4+                       | C <sub>ab</sub>  | 0.02830/(1,1,0)  | -0.84(14)  | -1.429(58) |
| A4+                       | N <sub>DMA</sub> | 0.04350/(0,0,1)  | -0.956(40) | -1.422(99) |
| A4+                       | C <sub>DMA</sub> | 0.03080/(0,0,1)  | 0.828(50)  | 1.02(12)   |
| A5+                       | O <sub>c</sub>   | 0.04000/(1,0,0)  | -1.442(88) | -1.312(36) |
| A5+                       | O <sub>c</sub>   | 0.04000/(0,1,0)  | -1.780(51) | -1.825(31) |
| A5+                       | O <sub>ab</sub>  | 0.02180/(0,0,1)  | 1.047(32)  | 1.094(79)  |
| A5+                       | O <sub>ab</sub>  | 0.02180/(0,0,1)  | 1.593(27)  | 1.317(71)  |
| A5+                       | C <sub>ab</sub>  | 0.03080/(0,0,1)  | -0.787(59) | -1.18(13)  |
| A5+                       | C <sub>ab</sub>  | 0.03080/(0,0,1)  | 0.128(52)  | 0.77(11)   |
| A5+                       | C <sub>c</sub>   | 0.05660/(1,0,0)  | -2.57(15)  | -2.044(67) |
| A5+                       | C <sub>c</sub>   | 0.05660/(0,1,0)  | -0.534(94) | -0.890(49) |
| A5+                       | N <sub>DMA</sub> | 0.05660/(1,0,0)  | 0.78(13)   | 0.585(52)  |
| A5+                       | N <sub>DMA</sub> | 0.05660/(0,1,0)  | 0.742(73)  | 0.788(38)  |
| A5+                       | C <sub>DMA</sub> | 0.04000/(1,0,0)  | -1.09(17)  | -0.729(65) |
| A5+                       | C <sub>DMA</sub> | 0.04000/(0,1,0)  | -0.93(10)  | -0.615(51) |
| Z3-                       | C <sub>u</sub>   | 0.04350/(0,0,1)  | 0.001(10)  | 0.018(31)  |
| Z3-                       | O <sub>c</sub>   | 0.03080/(0,0,1)  | 0.038(30)  | 0.13(12)   |
| Z3-                       | O <sub>ab</sub>  | 0.02180/(0,0,1)  | 0.008(31)  | 0.026(85)  |
| Z3-                       | C <sub>ab</sub>  | 0.03080/(0,0,1)  | 0.229(52)  | 0.18(14)   |
| Z3-                       | C <sub>DMA</sub> | 0.03080/(0,0,1)  | 0.070(50)  | 0.13(11)   |
| Z4-                       | O <sub>ab</sub>  | 0.02180/(0,0,1)  | -0.240(31) | -0.350(92) |
| Z4-                       | C <sub>ab</sub>  | 0.03080/(0,0,1)  | -0.067(54) | -0.05(15)  |
| Z5-                       | C <sub>u</sub>   | 0.05660/(1,0,0)  | 0.090(40)  | 0.021(15)  |
| Z5-                       | C <sub>u</sub>   | 0.05660/(0,1,0)  | 0.033(22)  | -0.041(10) |
| Z5-                       | O <sub>c</sub>   | 0.04000/(1,0,0)  | -0.04(10)  | 0.140(66)  |
| Z5-                       | O <sub>c</sub>   | 0.04000/(0,1,0)  | 0.007(64)  | 0.003(44)  |
| Z5-                       | O <sub>ab</sub>  | 0.02000/(1,1,0)  | -0.046(95) | -0.136(44) |
| Z5-                       | O <sub>ab</sub>  | 0.02000/(1,-1,0) | 0.209(97)  | 0.088(49)  |
| Z5-                       | O <sub>ab</sub>  | 0.02000/(1,-1,0) | 0.424(83)  | 0.379(40)  |
| Z5-                       | O <sub>ab</sub>  | 0.02000/(1,1,0)  | 0.145(84)  | -0.034(45) |
| Z5-                       | C <sub>ab</sub>  | 0.02830/(1,1,0)  | 0.83(13)   | 0.599(68)  |
| Z5-                       | C <sub>ab</sub>  | 0.02830/(1,-1,0) | -0.36(14)  | -0.256(70) |
| Z5-                       | C <sub>ab</sub>  | 0.02830/(1,-1,0) | -1.48(15)  | -0.174(76) |
| Z5-                       | C <sub>ab</sub>  | 0.02830/(1,1,0)  | -1.32(16)  | -0.098(75) |
| Z5-                       | C <sub>DMA</sub> | 0.04000/(1,0,0)  | 0.17(16)   | -0.060(60) |
| Z5-                       | C <sub>DMA</sub> | 0.04000/(0,1,0)  | -0.033(97) | 0.023(51)  |
| R <sub>F</sub> [I ≥ 3σ] % |                  | -                | 8.98       | 5.56       |

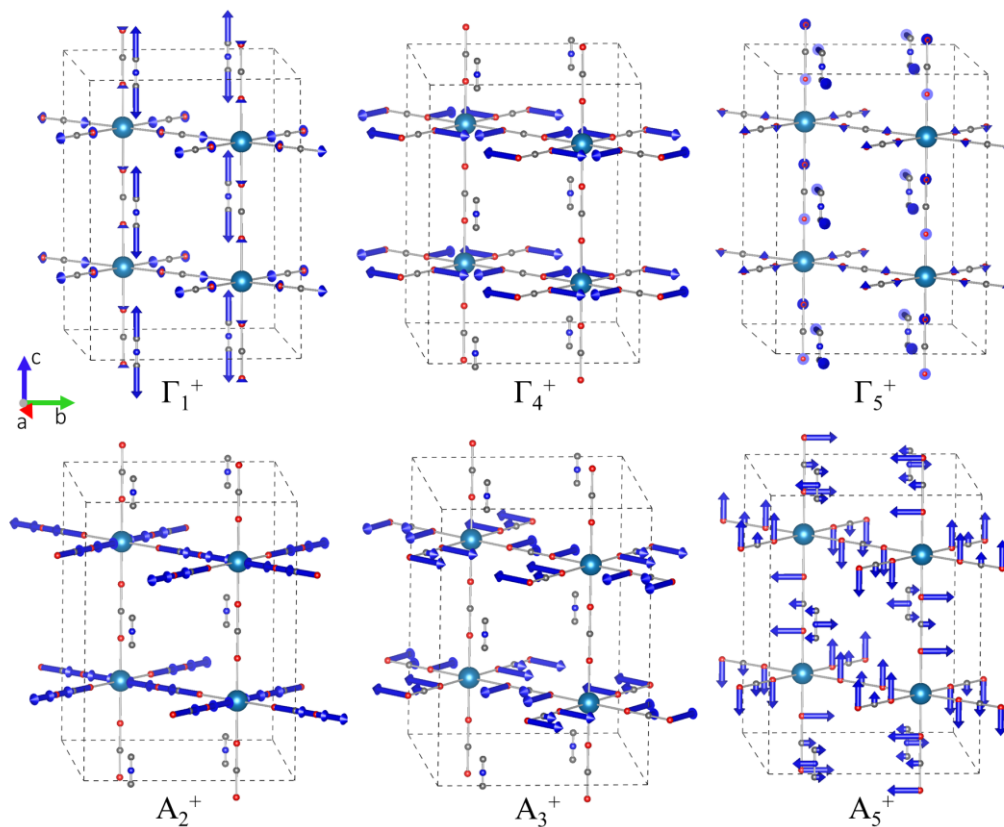

**Figure S5.** Representation of the active irreducible representation in the monoclinic  $I2/a$   $\alpha$ -phase of  $[(CH_3)_2NH_2]Cu(HCOO)_3$ . H atoms were omitted from the analysis.

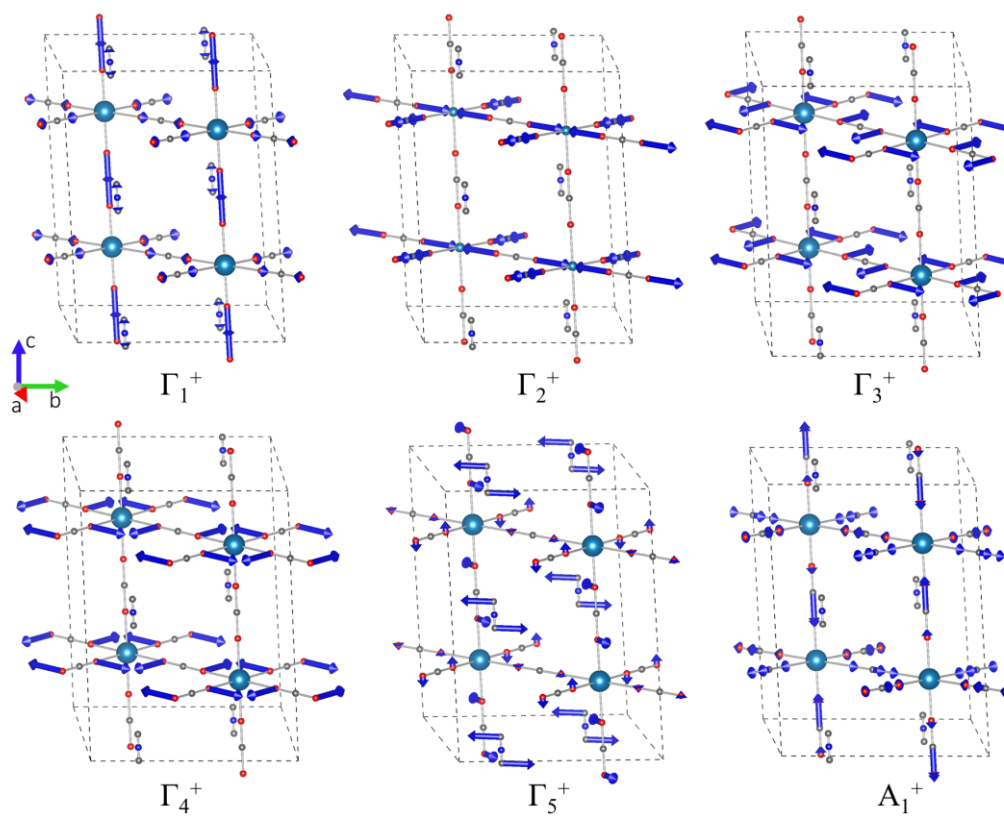

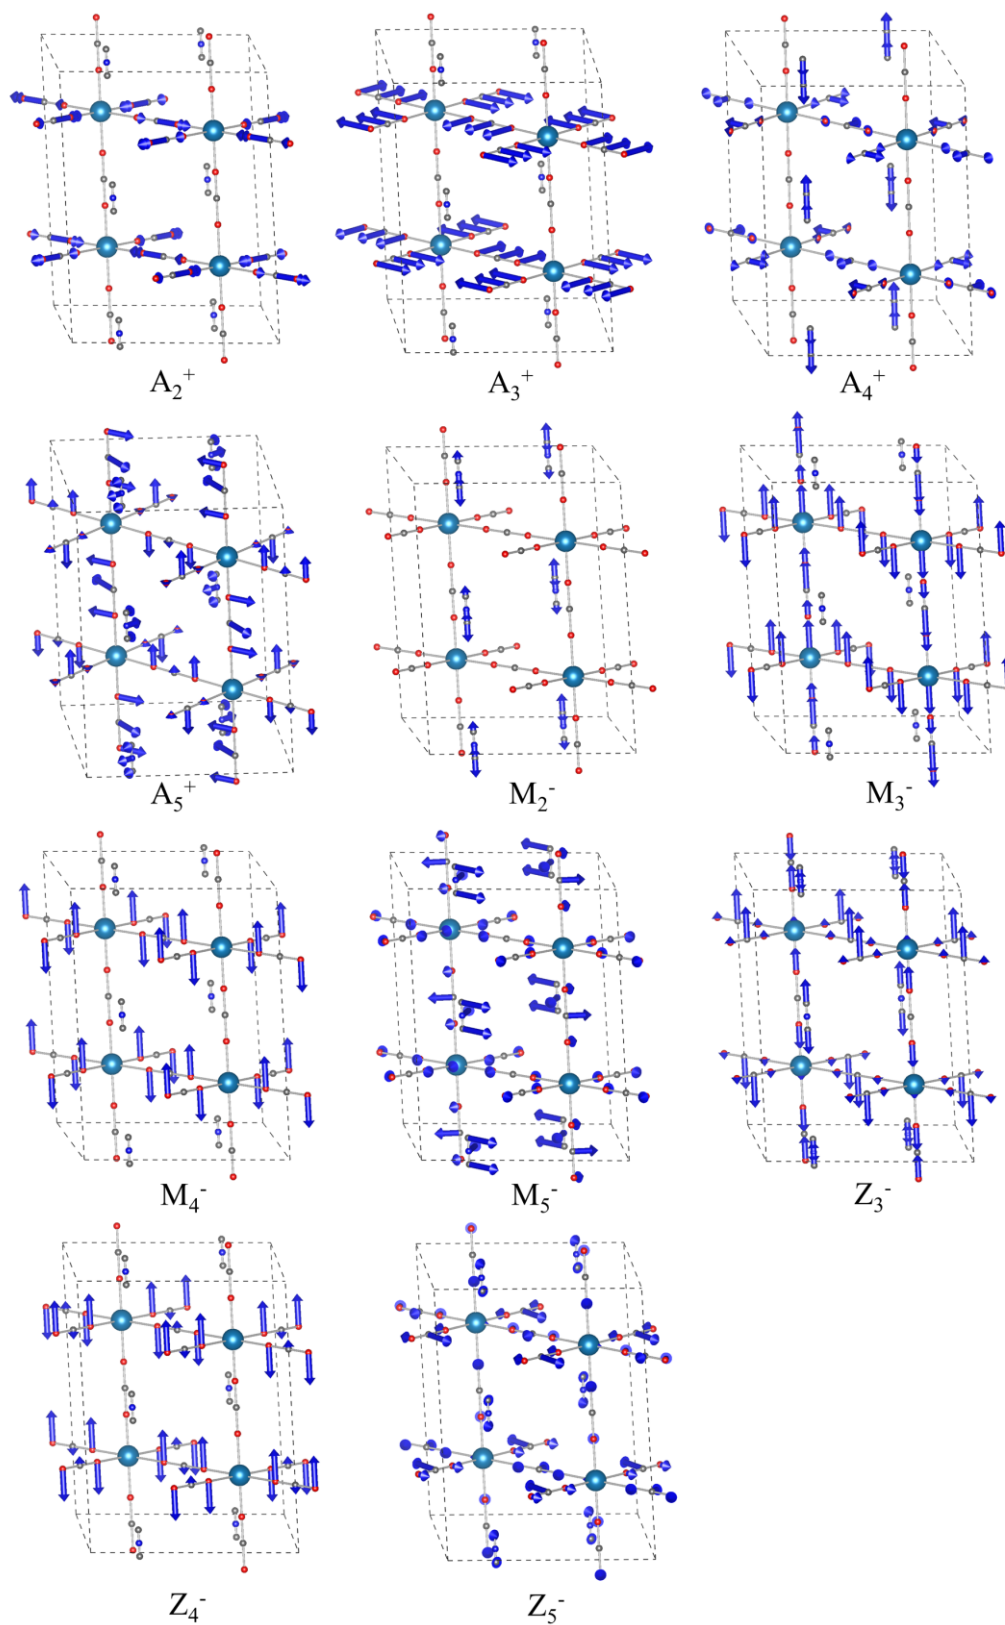

**Figure S6.** Representation of the active irreducible representation in the triclinic  $P-1$   $\gamma$ -phase of  $[(\text{CH}_3)_2\text{NH}_2]\text{Cu}(\text{HCOO})_3$ . H atoms were omitted from the analysis.

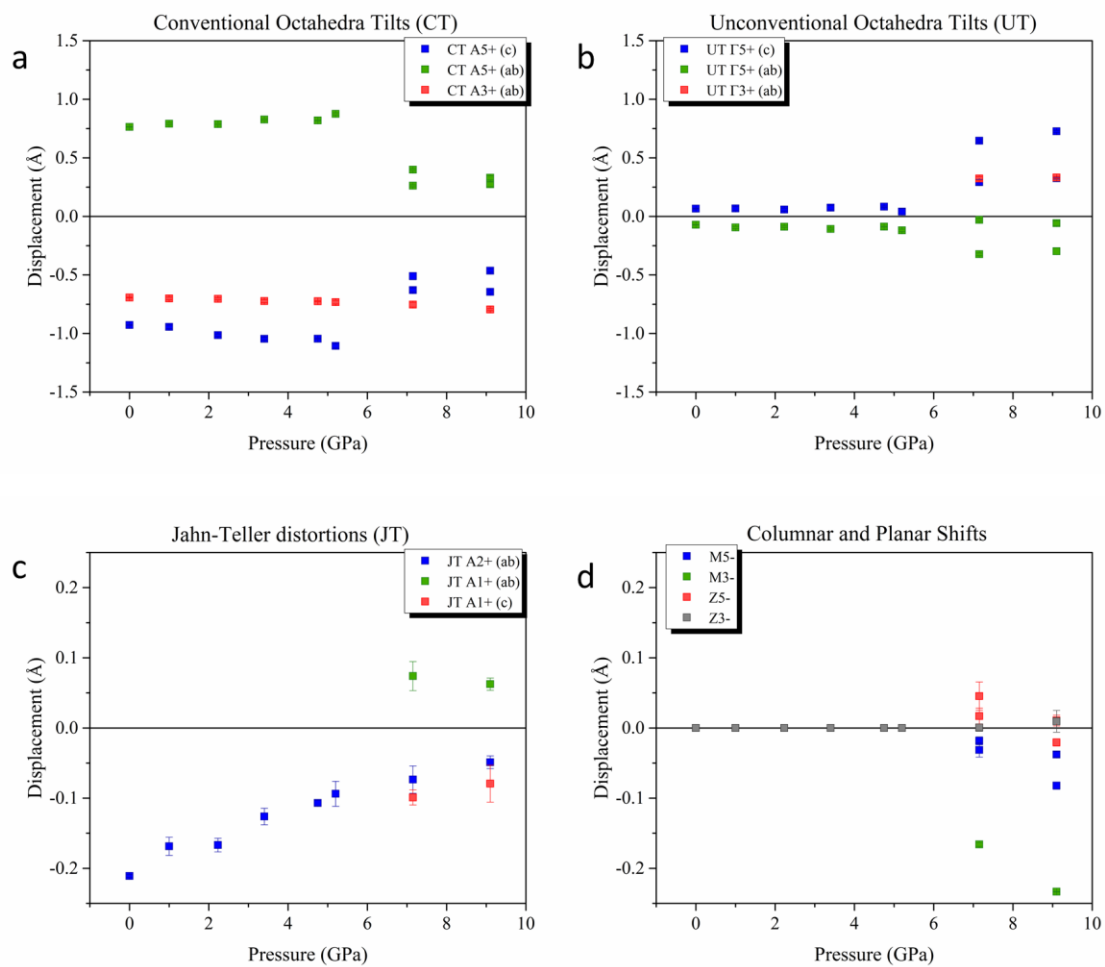

**Figure S7.** Pressure dependence of the displacement of (a) conventional and (b) unconventional octahedra tilts, (c) Jahn-Teller distortions and (d) Columnar and planar shifts of framework.
